# Supplementary material
Source: publisher figshare collection journal article supplement (https://acs.figshare.com/ndownloader/files/8817964)
Supplement: Supplementary file 1 [file 8817964]

Molecular strings for compounds 8-37.,,,,
,,,HIV-1 NL4-3,
compd,SMILE,CC50b,EC50c ± SD (nM),SId
,,(nM),,
8,O=C(NC(C)C1=C(F)C=CC=C1)C2=C(S(C3=CC(C)=CC(C)=C3)(=O)=O)C4=CC(Cl)=CC=C4N2,>51545,0.7,>73642
9,O=C(NC(C)C1=CC=CO1)C2=C(S(C3=CC(C)=CC(C)=C3)(=O)=O)C4=CC(Cl)=CC=C4N2,>54711,0.7,>78159
10,O=C(NC(C1CC1)C2=CC=C(Cl)C=C2)C3=C(S(C4=CC(C)=CC(C)=C4)(=O)=O)C5=CC(Cl)=CC=C5N3,>47397,132.7 ± 12,>359
11,O=C(NCC1=C(OC)C=CC=C1F)C2=C(S(C3=CC(C)=CC(C)=C3)(=O)=O)C4=CC(Cl)=CC=C4N2,>49903,0.6,>83172
12,O=C(NC(C)C1=CC(F)=CC(F)=C1)C2=C(S(C3=CC(C)=CC(C)=C3)(=O)=O)C4=CC(Cl)=CC=C4N2,>49706,0.6,>82842
13,O=C(NC(CF)C1=CC=CC=C1)C2=C(S(C3=CC(C)=CC(C)=C3)(=O)=O)C4=CC(Cl)=CC=C4N2,49178 ± 4103,0.7,>70255
14,O=C(NCC1=CC=CC(F)=C1F)C2=C(S(C3=CC(C)=CC(C)=C3)(=O)=O)C4=CC(Cl)=CC=C4N2,>51132,0.7,>73046
15,O=C(NC1=NC=CC(C#N)=C1)C2=C(S(C3=CC(C)=CC(C)=C3)(=O)=O)C4=CC(Cl)=CC=C4N2,>53773,0.6,>89621
16,O=C(NC1=CC=NC(C#N)=C1)C2=C(S(C3=CC(C)=CC(C)=C3)(=O)=O)C4=CC(Cl)=CC=C4N2,6840 ± 1420,0.7,>9771
17,O=C(NCC1=CC(N)=CC=C1)C2=C(S(C3=CC(C)=CC(C)=C3)(=O)=O)C4=CC(Cl)=CC=C4N2,>53422,0.7,>76317
18,O=C(NCC1=CC(NC(N)=N2)=C2C=C1)C3=C(S(C4=CC(C)=CC(C)=C4)(=O)=O)C5=CC(Cl)=CC=C5N3,5886 ± 335,0.6,>9810
19,O=C(NCC1=NNC2=C1C=CC=C2)C3=C(S(C4=CC(C)=CC(C)=C4)(=O)=O)C5=CC(Cl)=CC=C5N3,>50711 ± 0,0.6,>84518
20,O=C(NCC(NC(C)C1=CC=CC=C1)=O)C2=C(S(C3=CC(C)=CC(C)=C3)(=O)=O)C4=CC(Cl)=CC=C4N2,29387 ± 8,0.6,>48978
21,O=C(NC(C)C(NC(C)C1=CC=CC=C1)=O)C2=C(S(C3=CC(C)=CC(C)=C3)(=O)=O)C4=CC(Cl)=CC=C4N2,21745 ± 5626 ,0.6,>36856
22,O=C(NCC(NCC1=CC=NC=C1)=O)C2=C(S(C3=CC(C)=CC(C)=C3)(=O)=O)C4=CC(Cl)=CC=C4N2,>48924,0.2,>244620
23,O=C(NC(C)C(NCC1=CC=NC=C1)=O)C2=C(S(C3=CC(C)=CC(C)=C3)(=O)=O)C4=CC(Cl)=CC=C4N2,19465,0.2,102452
24,O=C(NCC(NC(C)C1=CC=NC=C1)=O)C2=C(S(C3=CC(C)=CC(C)=C3)(=O)=O)C4=CC(Cl)=CC=C4N2,47045 ± 762,0.6,>78408
25,O=C(NC(C)C(NC(C)C1=CC=NC=C1)=O)C2=C(S(C3=CC(C)=CC(C)=C3)(=O)=O)C4=CC(Cl)=CC=C4N2,21890 ± 557 ,0.6,>36483
26,O=C(NCC(NCCC1=CC=CS1)=O)C2=C(S(C3=CC(C)=CC(C)=C3)(=O)=O)C4=CC(Cl)=CC=C4N2,35730,3.8 ± 2.1,9478
27,O=C(NC(C)C(NCCC1=CC=CS1)=O)C2=C(S(C3=CC(C)=CC(C)=C3)(=O)=O)C4=CC(Cl)=CC=C4N2,9502,0.2,52789
28,O=C(NCC(NCCN1C([N+]([O-])=O)=NC=C1C)=O)C2=C(S(C3=CC(C)=CC(C)=C3)(=O)=O)C4=CC(Cl)=CC=C4N2,24466,0.2,143922
29,O=C(NC(C)C(NCCN1C([N+]([O-])=O)=NC=C1C)=O)C2=C(S(C3=CC(C)=CC(C)=C3)(=O)=O)C4=CC(Cl)=CC=C4N2,16012,0.2,94188
30,O=C(NCC(NCC1=NC=NC=C1)=O)C2=C(S(C3=CC(C)=CC(C)=C3)(=O)=O)C4=CC(Cl)=CC=C4N2,>48830,0.6,>81383
31,O=C(NC(C)C(NCC1=NC=NC=C1)=O)C2=C(S(C3=CC(C)=CC(C)=C3)(=O)=O)C4=CC(Cl)=CC=C4N2,28068 ± 2083,0.6,>46780
32,O=C(NCC(NCC1=CC=CO1)=O)C2=C(S(C3=CC(C)=CC(C)=C3)(=O)=O)C4=CC(Cl)=CC=C4N2,>50043,0.6,>83405
33,O=C(NC(C)C(NCC1=CC=CO1)=O)C2=C(S(C3=CC(C)=CC(C)=C3)(=O)=O)C4=CC(Cl)=CC=C4N2,24241 ± 9687 ,0.6,>40402
34,O=C(NCC(NCC1=CC=CC=C1F)=O)C2=C(S(C3=CC(C)=CC(C)=C3)(=O)=O)C4=CC(Cl)=CC=C4N2,>47349,0.6,>78916
35,O=C(NC(C)C(NCC1=CC=CC=C1F)=O)C2=C(S(C3=CC(C)=CC(C)=C3)(=O)=O)C4=CC(Cl)=CC=C4N2,23265 ± 7343,0.6,23265
36,O=C(NCC(NC(C)C1=CC=CC=C1F)=O)C2=C(S(C3=CC(C)=CC(C)=C3)(=O)=O)C4=CC(Cl)=CC=C4N2,23007 ± 4908,0.6,>38345
37,O=C(NC(C)C(NC(C)C1=CC=CC=C1F)=O)C2=C(S(C3=CC(C)=CC(C)=C3)(=O)=O)C4=CC(Cl)=CC=C4N2,15232 ± 199 ,0.6,>25387
